# Supplementary material for: Association between the Healthy Eating Index-2015 and Developmental Disabilities in Children: A Cross-Sectional Analysis
Source: MDPI journal article supplement (doi:10.3390/brainsci13091353), 2023-09-21
Supplement: s1 [file s1]

# Supplementary materials

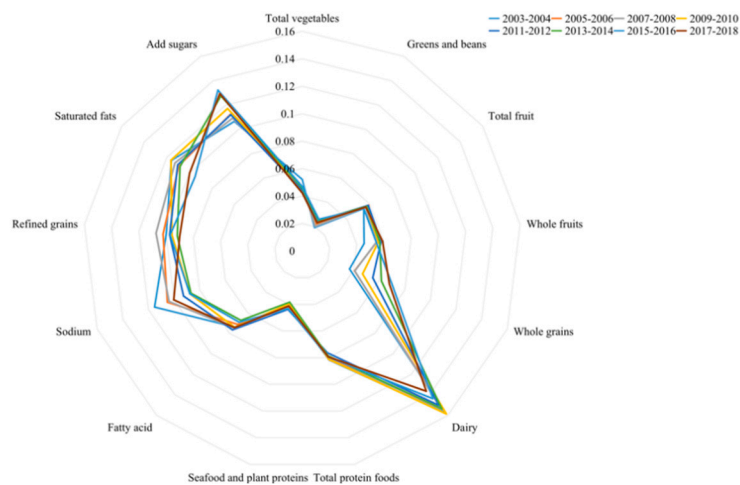

**Figure. S1** The ratio of the average score of each component to the total score of the HEI-2015.

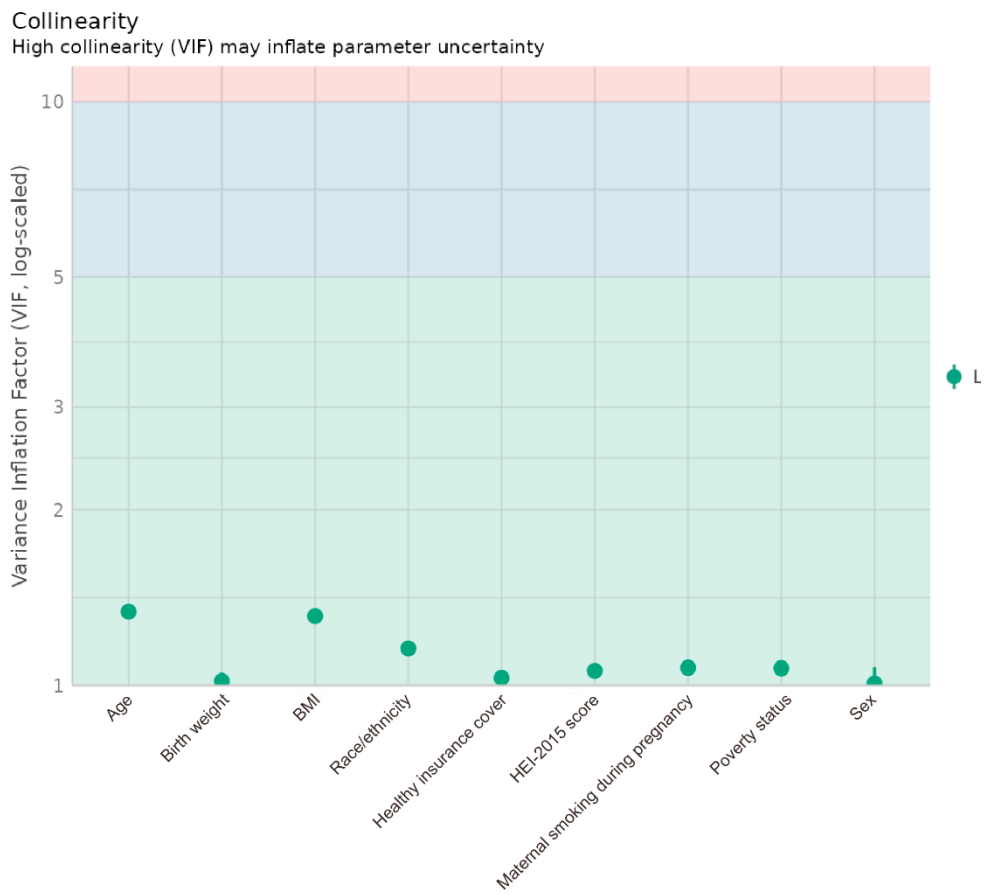

**Figure. S2** The variance inflation factor of variables.

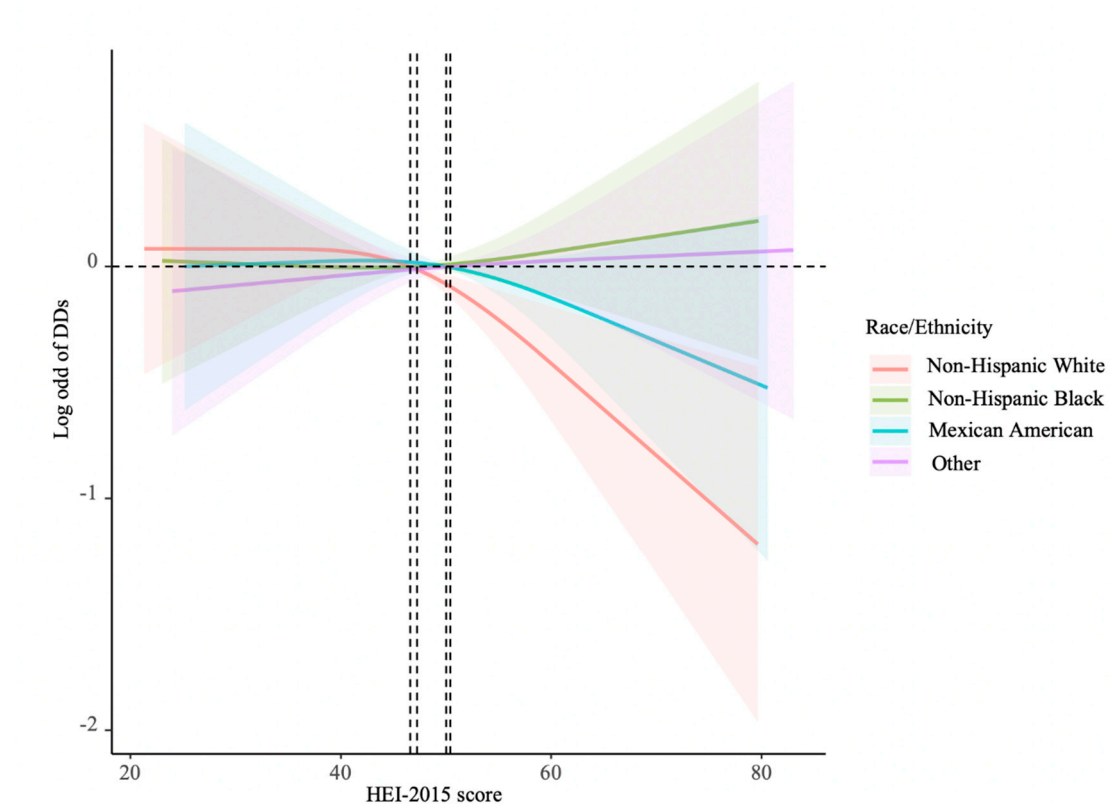

**Figure. S3** Smooth curve fitting of HEI-2015 score with DDs by race/ethnicity.

**Table. S1** HEI-2015 Components and Scoring Standards<sup>a</sup>

| HEI-2015 Components                                                    | Range of Points | Minimum Standard          | Scoring Maximum Standard  | Scoring |
|------------------------------------------------------------------------|-----------------|---------------------------|---------------------------|---------|
| <b>Adequacy Components</b> (higher score indicates higher consumption) |                 |                           |                           |         |
| Total Fruits                                                           | 0-5             | 0                         | 0.8 cup equiv. /1000 kcal |         |
| Whole Fruits                                                           | 0-5             | 0                         | 0.4 cup equiv./1000 kcal  |         |
| Total Vegetables                                                       | 0-5             | 0                         | 1.1 cup equiv. /1000 kcal |         |
| Greens and Beans                                                       | 0-5             | 0                         | 0.2 cup equiv. /1000 kcal |         |
| Total Protein Foods                                                    | 0-5             | 0                         | 2.5 oz equiv./1000 kcal   |         |
| Seafood and Plant Proteins                                             | 0-5             | 0                         | 0.8 oz equiv./1000 kcal   |         |
| Dairy                                                                  | 0-10            | 0                         | 1.3 cup equiv./1000 kcal  |         |
| Whole Grains                                                           | 0-10            | 0                         | 1.5 oz equiv. /1000 kcal  |         |
| Fatty Acids <sup>b</sup>                                               | 0-10            | (PUFAs + MUFAs)/SFAs ≤1.2 | (PUFAs + MUFAs)/SFAs ≥2.5 |         |

| <b>Moderation Components</b> (higher score indicates lower consumption) |      |                         |                          |
|-------------------------------------------------------------------------|------|-------------------------|--------------------------|
| Refined Grains                                                          | 0-10 | 4.3 oz equiv./1000 kcal | 1.8 oz equiv. /1000 kcal |
| Sodium                                                                  | 0-10 | 2.0 grams /1000 kcal    | 1.1 grams/1000 kcal      |
| Added Sugars                                                            | 0-10 | 26% of energy           | 6.5% of energy           |
| Saturated Fats                                                          | 0-10 | 16% of energy           | 8% of energy             |

<sup>a</sup>Intakes between the minimum and maximum standards are scored proportionately.

<sup>b</sup>Ratios of polyunsaturated and monounsaturated fatty acids (PUFAs and MUFAs) to saturated fatty acids (SFAs).

**Table. S2** Characteristics of participants included in NHANES 2003-2018 analyses by HEI-2015 quartile(n=11919) <sup>a</sup>.

| <b>Variable</b>       | <b>All</b>  | <b>HEI-Q1</b> | <b>HEI-Q2</b> | <b>HEI-Q3</b> | <b>HEI-Q4</b> | <b>P-value<sup>b</sup></b> |
|-----------------------|-------------|---------------|---------------|---------------|---------------|----------------------------|
| <b>Age</b>            | 10.04(0.04) | 10.67(0.08)   | 10.24(0.09)   | 9.69(0.09)    | 9.50(0.10)    | < 0.001                    |
| <b>BMI</b>            | 19.88(0.10) | 20.53(0.17)   | 20.04(0.15)   | 19.42(0.14)   | 19.50(0.16)   | < 0.001                    |
| <b>Sex</b>            |             |               |               |               |               | 0.05                       |
| Male                  | 5964(50.04) | 1573(53.11)   | 1503(51.33)   | 1466(51.84)   | 1422(47.64)   |                            |
| Female                | 5955(49.96) | 1407(46.89)   | 1477(48.67)   | 1514(48.16)   | 1557(52.36)   |                            |
| <b>Race/ethnicity</b> |             |               |               |               |               | < 0.001                    |
| Mexican American      | 3011(25.26) | 587(10.77)    | 751(14.16)    | 774(15.09)    | 899(18.15)    |                            |
| Non-Hispanic white    | 3540(29.7)  | 1086(64.02)   | 868(57.61)    | 824(55.06)    | 762(53.26)    |                            |
| Non-Hispanic black    | 3164(26.55) | 844(13.14)    | 864(15.01)    | 797(14.64)    | 659(11.90)    |                            |
| Other races           | 2204(18.49) | 463(12.07)    | 497(13.23)    | 585(15.21)    | 659(16.69)    |                            |
| <b>Poverty status</b> |             |               |               |               |               | 0.59                       |
| No                    | 8203(68.82) | 2095(78.25)   | 2015(75.80)   | 2056(77.61)   | 2037(76.84)   |                            |
| Yes                   | 3716(31.18) | 885(21.75)    | 965(24.20)    | 924(22.39)    | 942(23.16)    |                            |
| <b>Birth weight</b>   |             |               |               |               |               | 0.90                       |
| ≥5.5 lbs              | 10083(84.6) | 2511(85.19)   | 2522(86.28)   | 2516(85.68)   | 2534(85.81)   |                            |
| <5.5 lbs              | 1836(15.4)  | 469(14.81)    | 458(13.72)    | 464(14.32)    | 445(14.19)    |                            |

|                                          |              |             |             |             |             |                  |
|------------------------------------------|--------------|-------------|-------------|-------------|-------------|------------------|
| <b>Maternal smoking during pregnancy</b> |              |             |             |             |             | <b>&lt; 0.01</b> |
| No                                       | 5697(87.51)  | 1355(83.33) | 1403(83.42) | 1434(87.16) | 1505(91.82) |                  |
| Yes                                      | 813(12.49)   | 273(16.67)  | 224(16.58)  | 193(12.84)  | 123(8.18)   |                  |
| <b>With health insurance coverage</b>    |              |             |             |             |             | <b>0.38</b>      |
| No                                       | 1203(10.09)  | 263(7.16)   | 288(7.17)   | 314(8.49)   | 338(8.62)   |                  |
| Yes                                      | 10716(89.91) | 2717(92.84) | 2692(92.83) | 2666(91.51) | 2641(91.38) |                  |
| <b>DDs</b>                               |              |             |             |             |             | <b>&lt;0.01</b>  |
| No                                       | 10727(90)    | 2635(89.03) | 2660(88.44) | 2690(89.93) | 2742(92.77) |                  |
| Yes                                      | 1192(10)     | 345(10.97)  | 320(11.56)  | 290(10.07)  | 237(7.23)   |                  |

<sup>a</sup>Continuous data were displayed as weighted means (standard errors), while categorical variables were exhibited as unweighted numbers (weighted percentages). BMI, body mass index; NHANES, the national health and nutrition examination survey; HEI, Healthy Eating Index.

<sup>b</sup>P-values were calculated using Chi-square tests for categorical variables and Student's t-test for continuous variables.

**Table. S3** Subgroup analysis and interaction analysis of the association between the HEI-2015 score and DDs (NHANES 2003-2018).

| Variable              | OR (95%CI) <sup>a</sup> | P-value | P-interaction <sup>b</sup> |
|-----------------------|-------------------------|---------|----------------------------|
| <b>Age</b>            |                         |         | 0.71                       |
| ≤11 years             | 0.99(0.98,1.00)         | 0.06    |                            |
| >11 years             | 0.99(0.98,1.00)         | 0.10    |                            |
| <b>Sex</b>            |                         |         | 0.84                       |
| Male                  | 0.99(0.98,1.00)         | 0.06    |                            |
| Female                | 0.99(0.98,1.00)         | 0.10    |                            |
| <b>Race/ethnicity</b> |                         |         | <b>0.02</b>                |
| Mexican American      | 0.99(0.97,1.01)         | 0.41    |                            |
| Non-Hispanic white    | 0.98(0.97,0.99)         | <0.001  |                            |
| Non-Hispanic black    | 1.01(1.00,1.02)         | 0.09    |                            |
| Other races           | 1.00(0.98,1.02)         | 0.72    |                            |
| <b>Poverty status</b> |                         |         | 0.41                       |

|                                          |                 |       |      |
|------------------------------------------|-----------------|-------|------|
| No                                       | 0.99(0.98,1.00) | <0.01 |      |
| Yes                                      | 1.00(0.99,1.02) | 0.91  |      |
| <b>Birth weight</b>                      |                 |       | 0.10 |
| ≥5.5 lbs                                 | 0.99(0.98,1.00) | <0.01 |      |
| <5.5 lbs                                 | 1.00(0.98,1.02) | 0.78  |      |
| <b>Maternal smoking during pregnancy</b> |                 |       | 0.17 |
| No                                       | 0.99(0.98,1.00) | 0.07  |      |
| Yes                                      | 1.00(0.98,1.02) | 0.79  |      |
| <b>With health insurance coverage</b>    |                 |       | 0.44 |
| No                                       | 0.98(0.96,1.01) | 0.27  |      |
| Yes                                      | 0.99(0.98,1.00) | 0.02  |      |
| <b>BMI</b>                               |                 |       | 0.24 |
| <25                                      | 0.99(0.98,1.00) | <0.01 |      |
| ≥25                                      | 1.00(0.98,1.02) | 0.93  |      |

<sup>a</sup>Adjust for all covariables except for subgroup variables.

<sup>b</sup>P-interaction was used to evaluate the interaction, with <0.05 indicating statistical significance.

**Table. S4** Correction of p-values for primary results using the Benjamini and Hochberg FDR (BH) method.

| Variable                          | Model 1 <sup>a</sup> |                  | Model 2 <sup>b</sup> |                  |                 |                |
|-----------------------------------|----------------------|------------------|----------------------|------------------|-----------------|----------------|
|                                   | OR (95%CI)           | P-value          | Adjust P-value       | OR (95%CI)       | P-value         | Adjust P-value |
| <b>Whole fruits</b>               | 0.92(0.88,0.96)      | <b>&lt;0.001</b> | <b>0.001</b>         | 0.94(0.90,0.98)  | <b>&lt;0.01</b> | <b>0.04</b>    |
| <b>Total fruit</b>                | 0.91(0.87,0.96)      | <b>0.001</b>     | <b>&lt;0.01</b>      | 0.93(0.88,0.98)  | <b>0.01</b>     | <b>0.04</b>    |
| <b>HEI2015-score</b>              | 0.99(0.98,0.99)      | <b>0.001</b>     | <b>&lt;0.01</b>      | 0.99(0.98,1.00)  | <b>0.01</b>     | <b>0.04</b>    |
| <b>Saturated fats</b>             | 0.96(0.93,0.99)      | <b>0.02</b>      | 0.06                 | 0.96(0.93,1.00)  | <b>0.03</b>     | 0.09           |
| <b>Total vegetables</b>           | 0.93(0.86,0.99)      | <b>0.03</b>      | 0.07                 | 0.94 (0.87,1.00) | <b>0.05</b>     | 0.15           |
| <b>Seafood and plant proteins</b> | 0.95(0.91,1.00)      | <b>0.03</b>      | 0.07                 | 0.96(0.92,1.01)  | 0.09            | 0.21           |
| <b>Fatty acid</b>                 | 0.98(0.95,1.01)      | 0.15             | 0.30                 | 0.98(0.95,1.01)  | 0.26            | 0.52           |
| <b>Add sugars</b>                 | 1.00(0.97,1.03)      | 0.98             | 0.98                 | 1.01(0.97,1.04)  | 0.68            | 0.95           |
| <b>Total protein foods</b>        | 1.01(0.94,1.09)      | 0.78             | 0.88                 | 0.99(0.92,1.06)  | 0.76            | 0.95           |
| <b>Greens and beans</b>           | 0.97(0.92,1.03)      | 0.35             | 0.61                 | 0.99(0.94,1.05)  | 0.77            | 0.95           |
| <b>Whole grains</b>               | 0.99(0.95,1.03)      | 0.55             | 0.78                 | 1.00(0.96,1.04)  | 0.82            | 0.95           |
| <b>Dairy</b>                      | 1.00(0.97,1.04)      | 0.82             | 0.88                 | 1.00(0.97,1.04)  | 0.83            | 0.95           |
| <b>Sodium</b>                     | 0.99(0.96,1.02)      | 0.57             | 0.78                 | 1.00(0.97,1.03)  | 0.88            | 0.95           |
| <b>Refined grains</b>             | 1.01(0.98,1.03)      | 0.62             | 0.78                 | 1.00(0.97,1.03)  | 0.99            | 0.99           |

<sup>a</sup>Model 1 was a crude model with no adjusted covariates.

<sup>b</sup>Model 2 adjusted for age, sex, race/ethnicity, poverty status, birth weight, BMI, maternal smoking during pregnancy, and health insurance coverage status.
